# Supplementary material
Source: publisher figshare collection journal article supplement (https://acs.figshare.com/ndownloader/files/6451125)
Supplement: Supplementary file 1 [file 6451125]

# The Template Synthesis of Double Coaxial Carbon Nanotubes with Nitrogen-Doped and Boron-Doped Multiwalls

Quanhong Yang, Weihua Xu, Akira Tomita, and Takashi Kyotani\*

*Institute of Multidisciplinary Research for advanced Materials, Tohoku University, Sendai 980-8577, Japan*

## Supporting information

**Electrical resistance measurement.** The electrical resistance of the carbon-coated AAO films (CNT/AAO composites) was measured by a two-terminal method as shown in Figure S1. All the nanotubes prepared by the template technique were embedded in the nanochannels of AAO templates and parallel to each other as a result. We performed oxygen plasma treatment (100 W, 2 min) for CNT/AAO to remove the carbon layers deposited on the outer surface of AAO template. We coated both sides of a plasma-treated CNT/AAO composite film with silver paste (Dotite 550, Fujikura Kasei), to which two silver wires are attached. A potential (-1.0 to 1.0 V) is applied to both surfaces of the film through the two conducting wires and the I-V characteristics were measured at a temperature of 25 °C. According to the I-V curves, the resistances were obtained and then the specific resistivity of the prepared CNTs was induced. For each case, five samples were measured to obtain the average resistance ( $R_m$ ), after the error correction by subtracting the contact resistance of conducting wires and silver paste). The area (denoted as  $A$ ) of each side of CNT-AAO film employed is about  $0.5 \text{ cm}^2$ , and the number ( $n$ ) of nanotubes in an AAO template per unit area is estimated as  $5 \times 10^{10}/\text{cm}^2$  according to the SEM observation. Apparently, the resistance ( $R$ ) of an individual nanotube is determined from  $R_m$ ,  $n$  and  $A$  by the equation:  $R = nAR_m$ . Then the specific resistivity ( $\rho$ ) of CNT is calculated according to the equation:  $\rho = RS/L$  ( $S$ ,  $L$ : cross sectional area and length of an individual CNT, respectively).

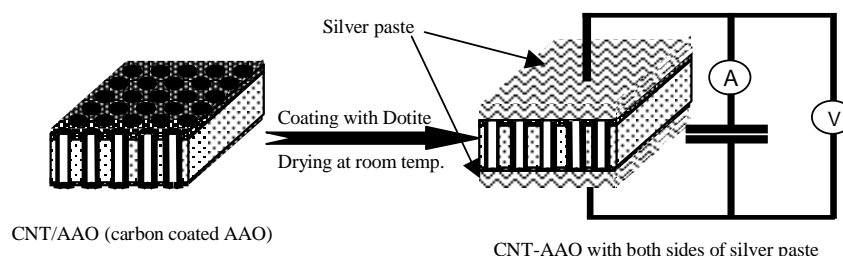

**Figure S1.** Schematic diagram of electrical conductance measurement of template-synthesized CNTs
